# Supplementary material for: A centimeter-scaled lead-free two-dimensional perovskite FA3Bi2Br9single crystal for X-ray detection
Source: Royal Society of Chemistry journal article supplement (doi:10.1039/d3tc01280h), 2023-01-01
Supplement: d3tc01280h1.pdf [file d3tc01280h1.pdf]

## Electronic Supplementary Information

### Centimeter-scaled lead-free two-dimensional $\text{FA}_3\text{Bi}_2\text{Br}_9$ perovskite single crystal for X-ray detection

*Xiuting Luo, Lei Gao, Kezheng Tao, Qiang Li and Qingfeng Yan\**

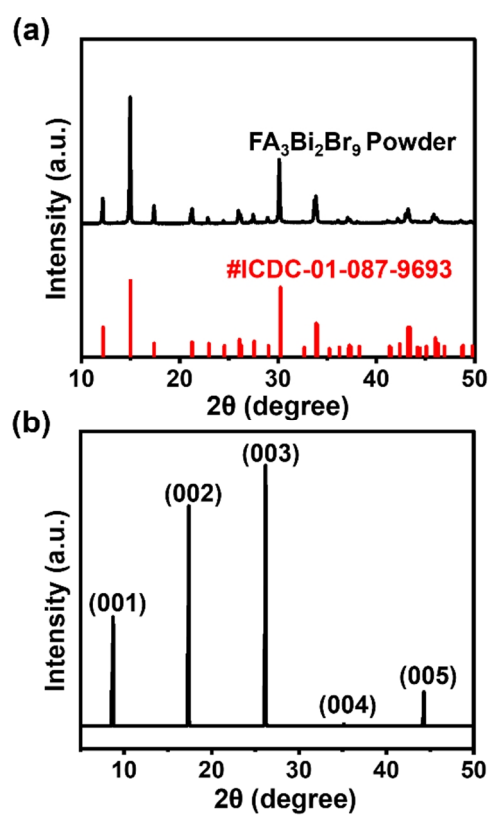

**Fig. S1** XRD pattern of (a)  $\text{FA}_3\text{Bi}_2\text{Br}_9$  powder. (b)  $\text{FA}_3\text{Bi}_2\text{Br}_9$  single crystal.

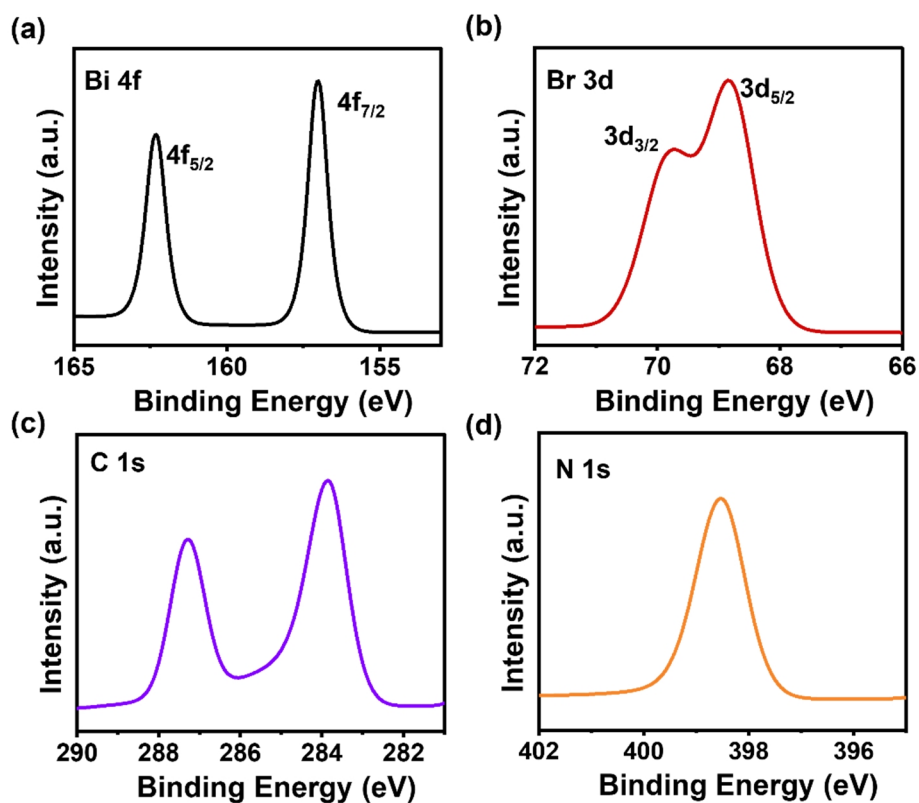

**Fig. S2** XPS high resolution fine spectrum of (a) Bi 4f and (b) Br 3d, (c) C 1s and (d) N 1s.

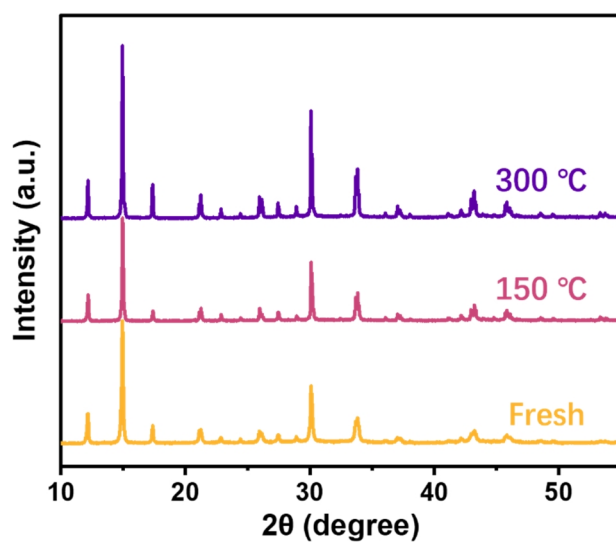

**Fig. S3** XRD patterns of fresh  $\text{FA}_3\text{Bi}_2\text{Br}_9$  powders and after heating at 150 °C and 300 °C for 2 h.

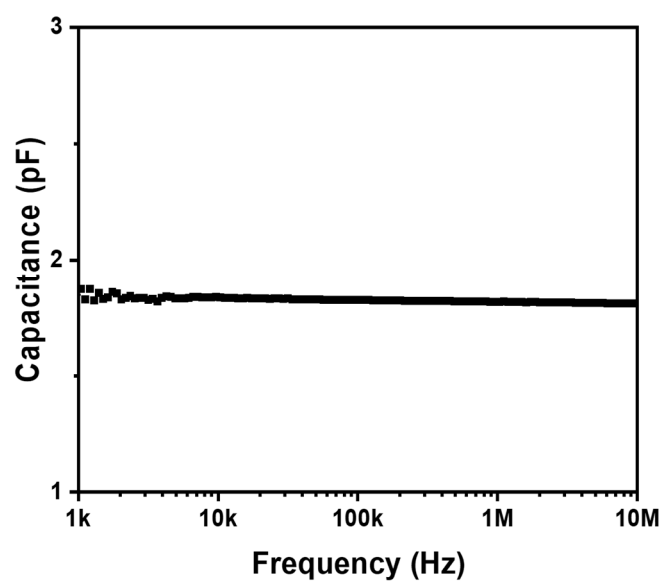

**Fig. S4** Frequency-capacitance curve of  $\text{FA}_3\text{Bi}_2\text{Br}_9$  SC.

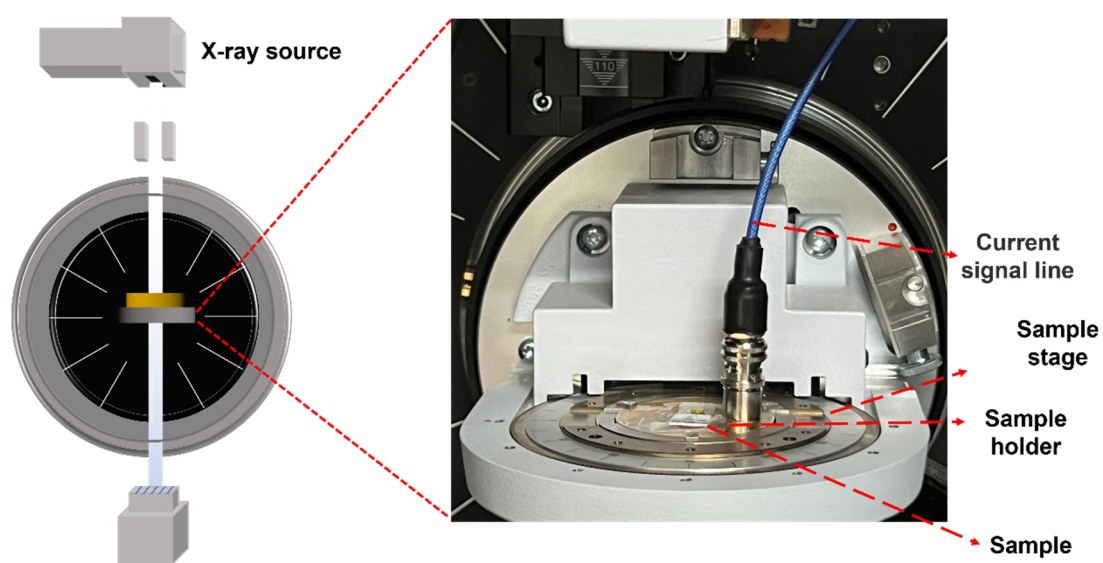

**Fig. S5** Home-made setup for X-ray detector measurement. The X-ray source was provided by a commercial Bruker D8 Advance XRD system equipped with a Cu tube.

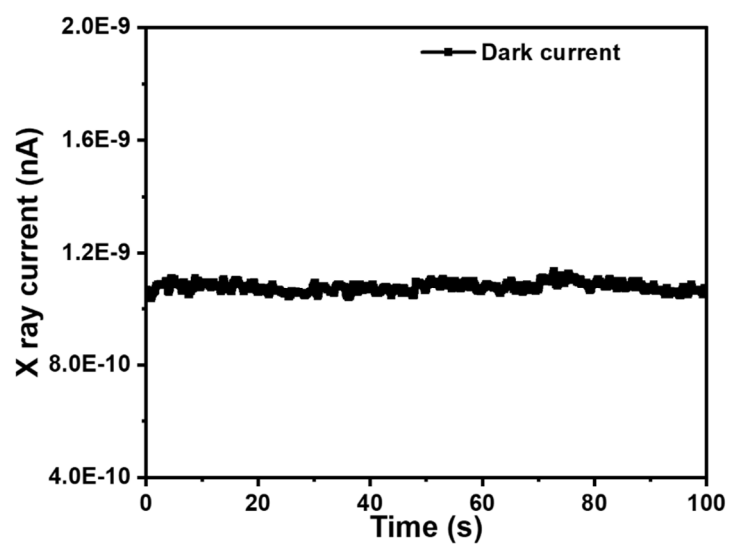

**Fig. S6** Dark current of the FA<sub>3</sub>Bi<sub>2</sub>Br<sub>9</sub> SC detector under a bias voltage of 5V.

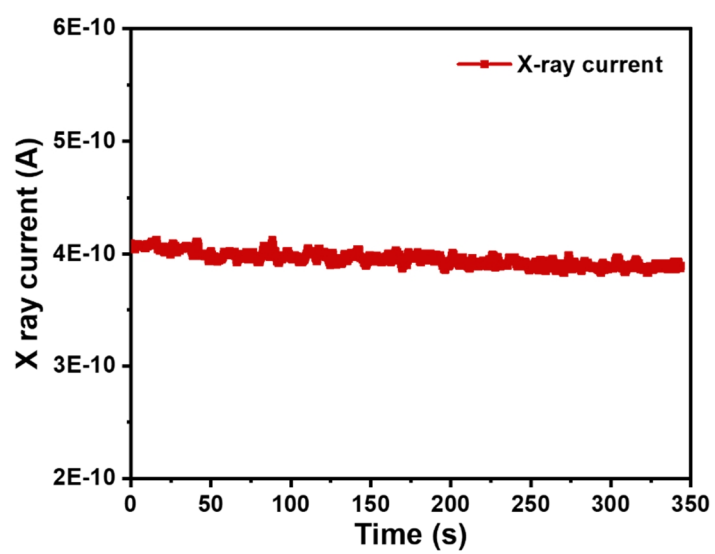

**Fig. S7** X-ray current of FA<sub>3</sub>Bi<sub>2</sub>Br<sub>9</sub> single crystal device under continuous X-ray irradiation on the basis of 5 V and a dose rate of 241  $\mu\text{Gy s}^{-1}$ .

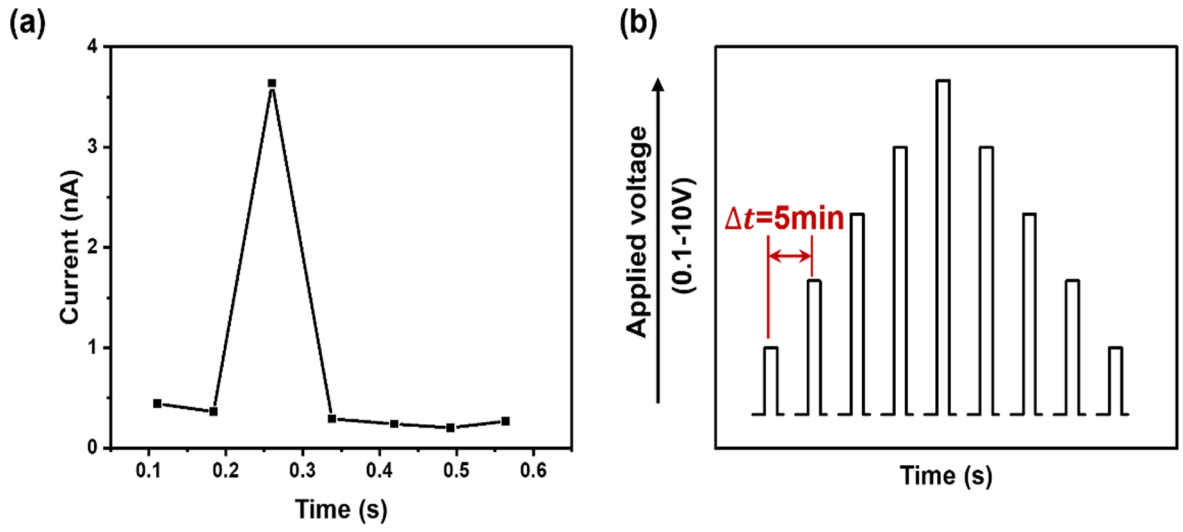

**Fig. S8** (a) The processing time for single pulsed voltage in the Pulsed-SCLC measurement. (b) In the diagram of pulsed voltage applied, the time interval between different pulse voltage values is 5 min.

**Table S1.** Key parameters comparison of different perovskites-based X-ray detectors.

| 2D hybrid halide perovskite single crystal                       | Electrical field (V/cm) | $\mu\tau$ ( $\text{cm}^2 \text{V}^{-1}$ ) | Sensitivity ( $\mu\text{C Gy}^{-1}\text{cm}^{-2}$ ) | Lowest detection limit ( $\text{nGy s}^{-1}$ ) | Reference        |
|------------------------------------------------------------------|-------------------------|-------------------------------------------|-----------------------------------------------------|------------------------------------------------|------------------|
| BA <sub>2</sub> EA <sub>2</sub> Pb <sub>3</sub> Br <sub>10</sub> | 50                      | $1.0 \times 10^{-2}$                      | 6800                                                | 5500                                           | 1                |
| (F-PEA) <sub>2</sub> PbI <sub>4</sub>                            | 1333                    | $5.1 \times 10^{-4}$                      | 3402                                                | 23                                             | 2                |
| (BA) <sub>2</sub> CsAgBiBr <sub>7</sub>                          | 50                      | $1.21 \times 10^{-3}$                     | 4.2                                                 | -                                              | 3                |
| (CPA <sub>4</sub> )AgBiBr <sub>8</sub>                           | 50                      | $1.0 \times 10^{-3}$                      | 0.8                                                 | -                                              | 4                |
| Cu-(PMA) <sub>2</sub> PbI <sub>4</sub>                           | 12500                   | $8.05 \times 10^{-3}$                     | 283                                                 | 2130                                           | 5                |
| (BDA)PbI <sub>4</sub>                                            | 3100                    | $4.43 \times 10^{-4}$                     | 242                                                 | 430                                            | 6                |
| (DFPIP) <sub>4</sub> AgBiI <sub>8</sub>                          | ~1000                   | $1.10 \times 10^{-5}$                     | 188                                                 | 3130                                           | 7                |
| (PA) <sub>4</sub> AgBiBr <sub>8</sub>                            | 1250                    | -                                         | 6.89                                                | 2070000                                        | 8                |
| <b>FA<sub>3</sub>Bi<sub>2</sub>Br<sub>9</sub></b>                | <b>1000</b>             | <b><math>4.53 \times 10^{-4}</math></b>   | <b>410</b>                                          | <b>2100</b>                                    | <b>This work</b> |
|                                                                  | <b>2000</b>             |                                           | <b>623</b>                                          |                                                |                  |

\*BA = n-butylammonium

EA = ethylammonium

CPA = chloropropylammonium

BDA = 1,4-butanediammonium

DFPIP = 4,4-difluoropiperidinium

F-PEA = fluorophenethylammonium

## Reference

- 1 C. Ji, S. Wang, Y. Wang, H. Chen, L. Li, Z. Sun, Y. Sui, S. Wang, J. Luo, *Adv. Funct. Mater.*, 2019, **30**, 1905529.
- 2 H. Li, J. Song, W. Pan, D. Xu, W. a. Zhu, H. Wei, B. J. A. M. Yang, *Adv. Mater.*, 2020, **32**, 2003790.
- 3 Z. Xu, X. Liu, Y. Li, X. Liu, T. Yang, C. Ji, S. Han, Y. Xu, J. Luo, Z. Sun, *Angew. Chem. Int. Edit.*, 2019, **58**, 15757.
- 4 W. Guo, X. Liu, S. Han, Y. Liu, Z. Xu, M. Hong, J. Luo, Z. Sun, *Angew. Chem. Int. Edit.*, 2020, **59**, 13879.
- 5 C. Qian, M. Wang, S. Lu, H. Feng, *Appl. Phys. Lett.*, 2022, **120**, 011901.
- 6 Y. Shen, Y. Liu, H. Ye, Y. Zheng, Q. Wei, Y. Xia, Y. Chen, K. Zhao, W. Huang, S. Liu, *Angew. Chem. Int. Edit.*, 2020, **59**, 14896.
- 7 C. Wang, H. Li, M. Li, Y. Cui, X. Song, Q. Wang, J. Jiang, M. Hua, Q. Xu, K. Zhao, *Adv. Funct. Mater.*, 2021, **31**, 2009457.
- 8 P. Liu, Y. Xiao, Z. Yang, S. Yu, X. Meng, *Opt. Mater.*, 2022, **133**, 112972.
